# Supplementary material for: Post-translational Modifications of Beta-Amyloid Alter Its Transport across the Blood-Brain Barrier
Source: Preprints.org preprint supplement (doi:10.20944/preprints202312.1326.v1), 2023-12-18
Supplement: Supplementary file 1 [file supplementary]

**Supplementary materials**

**Post-translational modifications of beta-amyloid alter its transport across the blood-brain barrier**

Kseniya B. Varshavskaya1, Irina Yu. Petrushanko1, Vladimir A. Mitkevich1,*, Evgeny P. Barykin1 and Alexander A. Makarov1

**
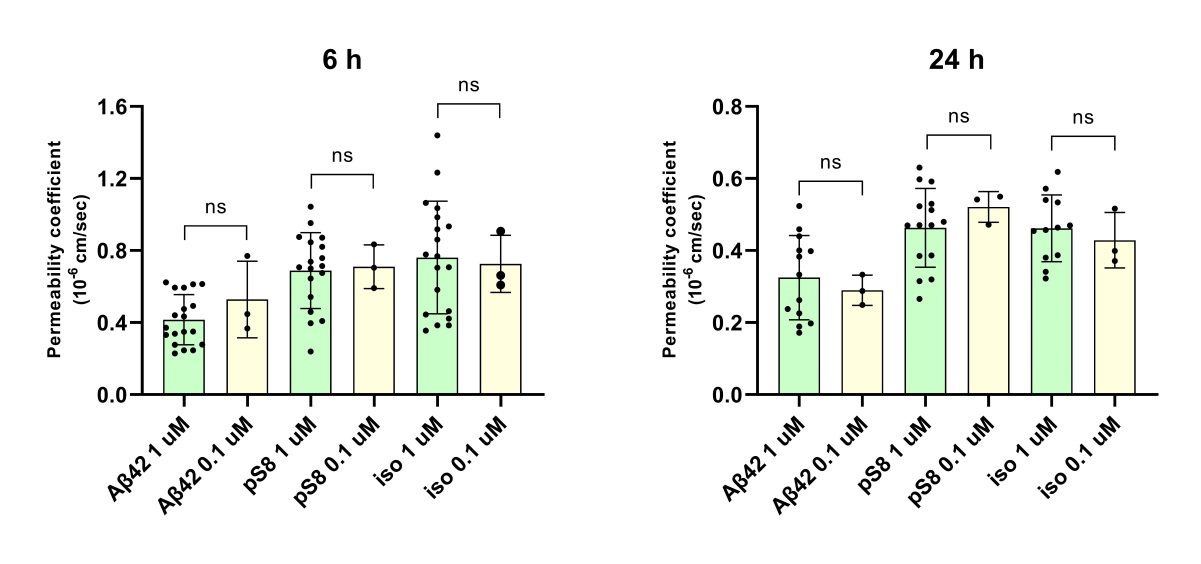
**

**Figure S1.** **Permeability coefficient of amyloid beta isoforms after incubation with 1 µM or 0.1 µM for 6 and 24 hours**. Ns - not significant.


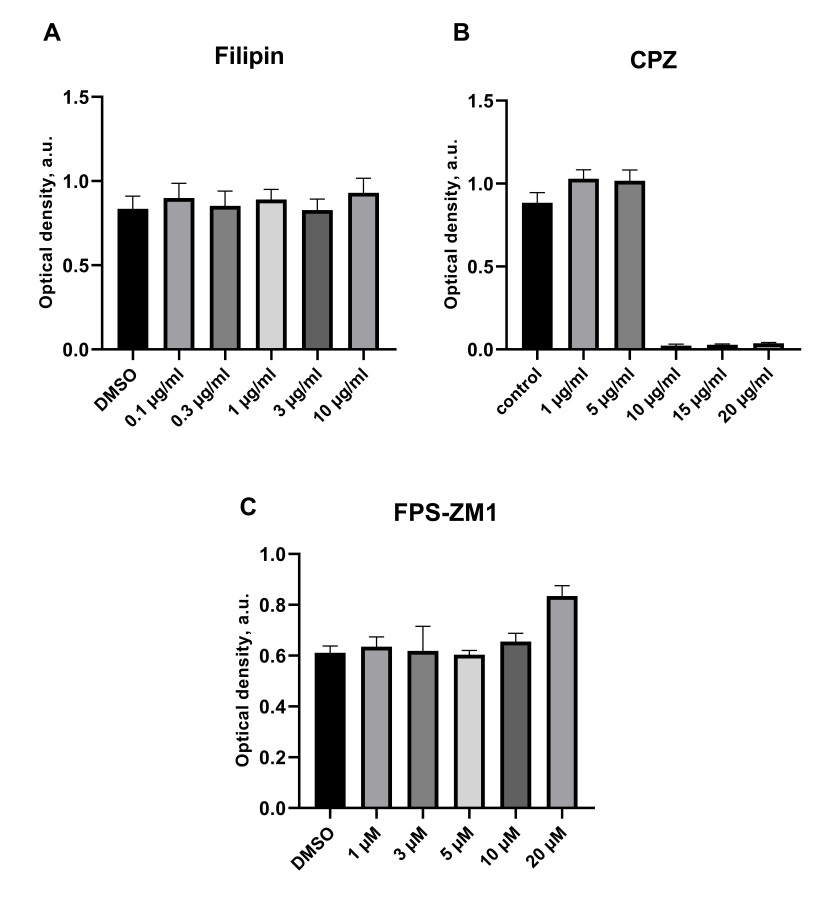


**Figure S2. Testing the toxicity of filipin (A), chlorpromazine (B) and FPS-ZM1 (C) for bEnd.3 cells.** Cells were incubated with various concentrations of inhibitors or an equivalent amount of DMSO for 24 hours. Toxicity was assessed using MTT (Filipin) and WST (FPS-ZM1 and chlorpromazine) tests. Optical density at various inhibitor concentrations is presented. Number of replicates in each group n = 3-4.
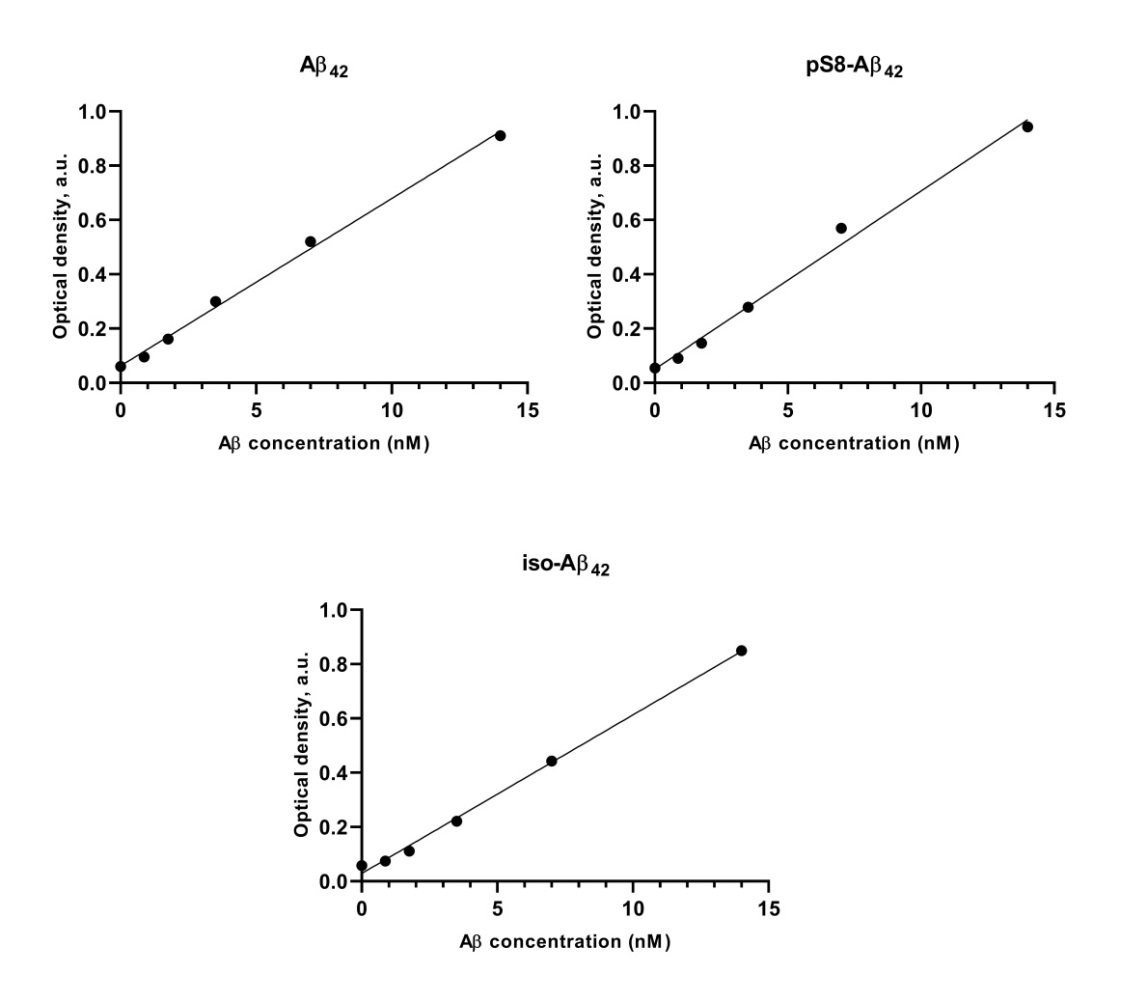


**Figure S3. ELISA calibration curves for Aβ42, pS8-Аβ42 and iso-Аβ42.**
